# Supplementary material for: Uric Acid and Grip Strength as Predictors of Mortality in Older Adults: A Sex-Stratified Analysis
Source: Research Square preprint supplement (doi:10.21203/rs.3.rs-6913893/v1), 2025-06-25
Supplement: Supplementary file 1 [file cc3aabfbe107a9ec70cbd583.docx]

**Supplementary Table S1. Comparison of laboratory measurements across serum uric acid quartile groups.**

| **Variables** | **Serum Uric Acid Quartiles** | | | | **Total (*n*=910)** | ***p*-value** | **adj.*p*-value** |
| --- | --- | --- | --- | --- | --- | --- | --- |
| **1.Quartile (*n*=225)** | **2.Quartile (*n*=231)** | **3.Quartile (*n*=225)** | **4.Quartile (*n*=229)** |
| AST (u/L) | 78.00±20.19 | 83.00±18.83 | 1036.00±30.17 | 158±22.24 | 22.81±56.13 | 0.548 | 0.759 |
| ALT (u/L) | 78.00±16.20 | 80.00±15.57 | 1076.00±28.12 | 310±20.17 | 19.90±60.93 | 0.519 | 0.759 |
| Albumin (g/dL) | 5.13±4.40 | 5.25±4.44 | 49.00±4.69 | 5.19±4.42 | 4.49±1.53 | 0.159 | 0.318 |
| Platelet (10^3/µL) | 583.00±262.11 | 735.00±267.44 | 707.00±256.85 | 3030.00±268.17 | 263.72±122.44 | 0.762 | 0.914 |
| Hemoglobin A1C (%) | 11.70±6.82 | 8.46±6.37 | 9.42±6.23 | 9.70±6.72 | 6.57±1.23 | 0.109 | 0.280 |
| Glucose (mg/dL) | 445.00±135.07a | 375.00±125.35ab | 394.00±120.67b | 506.00±124.90ab | 126.48±54.98 | **0.041** | 0.148 |
| Triglycerides (mg/dL) | 838.00±142.45a | 435.00±152.27a | 568.00±159.83ab | 646.00±181.16b | 158.93±86.45 | **<0.001** | **<0.001** |
| Total cholesterol (mg/dL) | 396.00±206.77 | 311.00±202.54 | 388.00±210.20 | 382.00±206.15 | 206.52±51.53 | 0.840 | 0.945 |
| HDL cholesterol (mg/dL) | 519.00±55.76a | 111.90±51.05ab | 94.40±49.21b | 130.00±47.98b | 51.00±20.91 | **0.001** | **0.006** |
| LDL cholesterol (mg/dL) | 230.00±117.48 | 238.80±116.29 | 226.90±116.89 | 260.80±115.99 | 116.66±37.19 | 0.976 | 0.997 |
| C-reactive protein (mg/L) | 190.30±7.56 | 146.66±8.67 | 112.93±7.28 | 220.00±9.60 | 8.28±18.83 | 0.620 | 0.797 |
| White blood cell (µL) | 14950.00±344.10 | 10610.00±351.52 | 12050.00±342.89 | 10940.00±374.89 | 353.52±1626.48 | 0.997 | 0.997 |
| Hemoglobin (g/dL) | 44.10±13.92 | 17.70±13.73 | 17.50±13.59 | 35.50±13.46 | 13.68±2.12 | 0.135 | 0.304 |
| Mean corpuscular volüme (FL) | 116.00±86.71 | 103.70±86.59 | 267.00±87.64 | 125.70±85.03 | 86.47±10.27 | 0.098 | 0.280 |
| Systolic blood pressure (mmHg) | 160.00±128.85a | 185.00±133.51b | 210.00±130.67ab | 200.00±132.94ab | 131.52±16.68 | **0.035** | 0.148 |
| Diastolic blood pressure (mmHg) | 110.00±78.45 | 150.00±79.16 | 125.00±77.31 | 120.00±77.77 | 78.17±11.34 | 0.444 | 0.727 |
| Creatinine (mg/dL) | 179.00±2.11 | 6.24±0.89 | 75.60±1.32 | 55.70±1.39 | 1.43±7.59 | 0.420 | 0.727 |
| Ure (mg/dL) | 16.10±16.88a | 12.00±17.65a | 8.10±19.53a | 8.18±22.76b | 19.22±11.28 | **<0.001** | **<0.001** |

**AST: aspartate aminotransferase; ALT: alanine transaminase; LDL: low-density lipoprotein; HDL: high-density lipoprotein. adj. *p*-value: adjustment *p*-value. Statistically significant *p* values are shown in bold.**

**Supplementary Table S2. Comparison of laboratory measurements across handgrip strenght groups.**

| **Variables** | **Handgrip Group** | | **Total**  **(*n*=910)** | ***p*-value** | **adj.*p*-value** |
| --- | --- | --- | --- | --- | --- |
| **High (*n*=206)** | **Low (*n*=704)** |
| AST (u/L) | 20.83±9.73 | 23.00±58.59 | 22.81±56.13 | 0.842 | 0.982 |
| ALT (u/L) | 20.90±14.77 | 19.81±63.61 | 19.90±60.93 | 0.927 | 0.982 |
| Albumin (g/dL) | 4.48±0.33 | 4.49±1.73 | 4.49±1.53 | 0.908 | 0.982 |
| Platelet (10^3/µL) | 259.65±69.19 | 264.98±134.76 | 263.72±122.44 | 0.590 | 0.817 |
| Hemoglobin A1C (%) | 7.12±1.94 | 6.53±1.15 | 6.57±1.23 | 0.319 | 0.638 |
| Glucose (mg/dL) | 133.54±61.08 | 124.40±52.92 | 126.48±54.98 | 0.053 | 0.239 |
| Triglycerides (mg/dL) | 178.38±109.51 | 153.18±77.52 | 158.93±86.45 | **0.003** | **0.027** |
| Total cholesterol (mg/dL) | 209.04±51.73 | 205.58±51.53 | 206.52±51.53 | 0.584 | 0.817 |
| HDL cholesterol (mg/dL) | 49.91±12.78 | 51.32±22.76 | 51.00±20.91 | 0.404 | 0.727 |
| LDL cholesterol (mg/dL) | 122.87±39.38 | 114.83±36.36 | 116.66±37.19 | **0.007** | **0.042** |
| C-reactive protein (mg/L) | 6.60±18.62 | 8.79±18.89 | 8.28±18.83 | 0.176 | 0.634 |
| White blood cell (µL) | 791.73±2346.35 | 218.01±1300.13 | 353.52±1626.48 | **0.001** | **0.018** |
| Hemoglobin (g/dL) | 13.82±1.51 | 13.64±2.28 | 13.68±2.12 | 0.293 | 0.638 |
| Mean corpuscular volüme (FL) | 86.60±6.79 | 86.42±11.14 | 86.47±10.27 | 0.842 | 0.982 |
| Systolic blood pressure (mmHg) | 131.54±15.65 | 131.51±16.97 | 131.52±16.68 | 0.983 | 0.983 |
| Diastolic blood pressure (mmHg) | 78.62±10.98 | 78.05±11.44 | 78.17±11.34 | 0.583 | 0.817 |
| Creatinine (mg/dL) | 0.93±0.71 | 1.58±8.68 | 1.43±7.59 | 0.289 | 0.638 |
| Ure (mg/dL) | 18.44±13.08 | 19.45±10.68 | 19.22±11.28 | 0.288 | 0.638 |

**AST: aspartate aminotransferase; ALT: alanine transaminase; LDL: low-density lipoprotein; HDL: high-density lipoprotein. adj. *p*-value: adjustment *p*-value. Statistically significant *p* values are shown in bold.**
